# Supplementary material for: Exploration of prognosis and immune infiltration characteristics in Glioblastoma Multiforme based on Lipid Metabolism related Genes
Source: Research Square preprint supplement (doi:10.21203/rs.3.rs-6767545/v1), 2025-06-18
Supplement: Supplementary file 1 [file fc7722d9f0a3f71c436f8651.docx]

| Characteristics | Total ( N=172 ) | Cluster1 ( N=100 ) | Cluster2 ( N=72 ) |
| --- | --- | --- | --- |
| Age  ＞ 60  ≤ 60 | 93 ( 54.07% )  79 ( 45.93% ) | 53 ( 30.81% )  47 ( 27.33% ) | 40 ( 23.26% )  32 ( 18.60% ) |
| Sex  Female  Male | 75 ( 43.60% )  97 ( 56.40% ) | 44 ( 25.58% )  56 ( 32.56% ) | 31 ( 18.02% )  41 ( 23.84% ) |
| OS  Mean ± SD  Median ( min-max ) | 1612.06 ± 832.02  1481.0 ( 76.0-3667.0 ) | 1572.51 ± 880.11  1481.0 ( 76.0-3667.0 ) | 1667.00 ± 762.84  1481.0 ( 97.0-3667.0 ) |
| Histological Type  Treated primary  Untreated primary | 15 ( 8.72% )  157 ( 91.28% ) | 9 ( 5.23% )  91 ( 52.91% ) | 6 ( 3.49% )  66 ( 38.37% ) |
| Event  Alive  Dead | 54 ( 31.40% )  118 ( 68.60% ) | 30 ( 17.44% )  70 ( 40.70% ) | 24 ( 13.95% )  48 ( 27.91% ) |
| Cancer Status  Progression of Disease  Recurrence  NA | 101 ( 60.12% )  42 ( 25.00% )  25 ( 14.88% ) | 59 ( 35.12% )  23 ( 13.69% )  16 ( 9.52% ) | 42 ( 25.00% )  19 ( 11.31% )  9 ( 5.36% ) |

Table 1 Characteristics of patients in the cluster 1 and cluster 2.
